# Supplementary material
Source: PubMed Central journal article supplement (PMC5673550)
Supplement: NIHMS891078-supplement-Supp_info.pdf [file NIHMS891078-supplement-Supp_info.pdf]

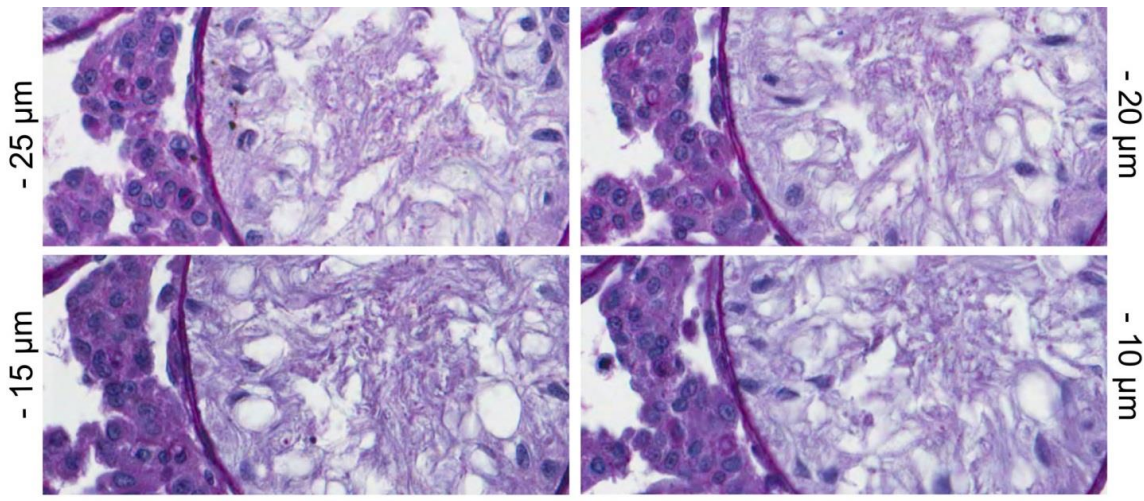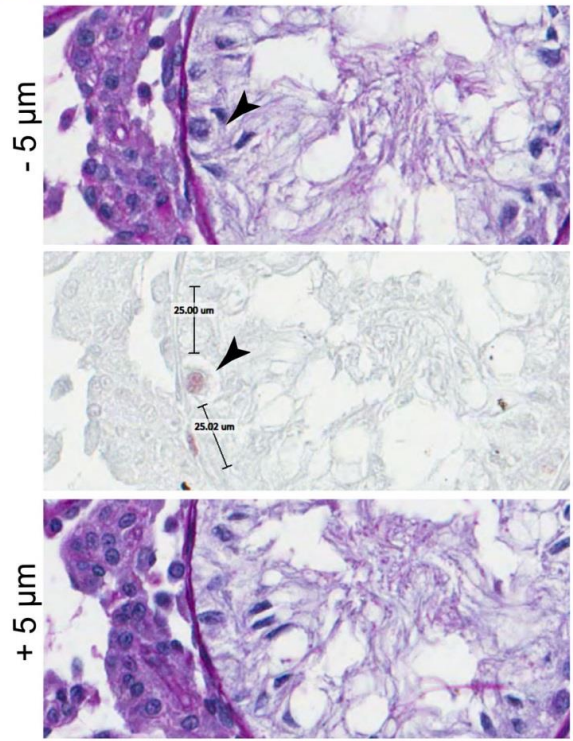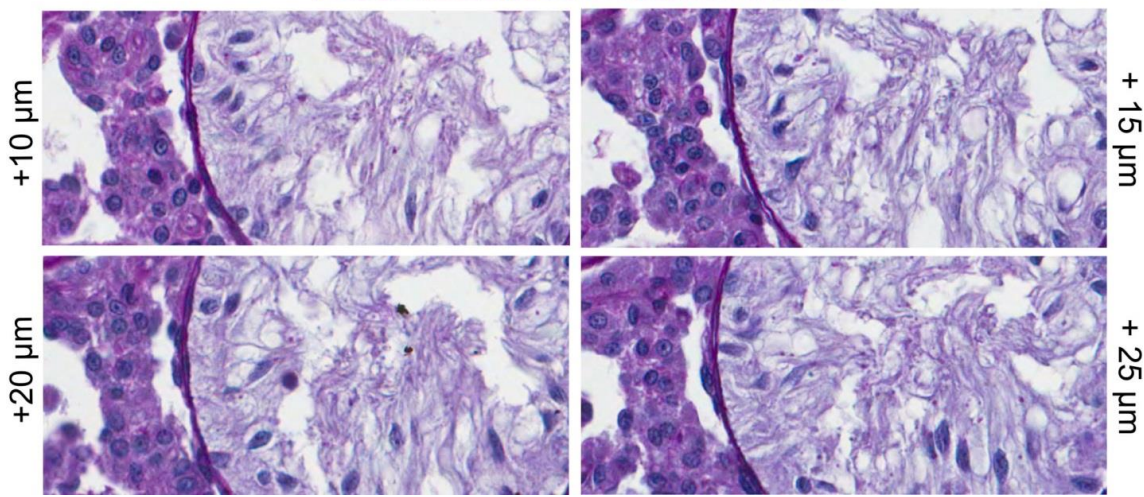

Figure S1. Identification of spermatogonial stem cells and SSC proliferation rate. Isolated germ cells were identified on the central section. Five serial 5  $\mu\text{m}$  sections on either side were checked for germ cells to confirm that no germ cells were present within 25  $\mu\text{m}$  of the isolated germ cell. Once cells meeting the definition of SSCs were identified, the SSC proliferation rate was determined based on the BrdU-positivity of the SSC identified in the central section. This series of images shows a SSC that was identified in the central section, also present in one immediately adjacent section (arrowheads). The SSC is BrdU-positive. The two bars on either side of the SSC = 25  $\mu\text{m}$ , measured along the basement membrane in Aperio ImageScope.
